# Supplementary material for: Design of nanostructured WO3·0.33H2O via combination of ultrasonic spray nozzle and microwave-assisted hydrothermal methods for enhancing isopropanol gas sensing at room temperature
Source: Royal Society of Chemistry journal article supplement (doi:10.1039/c7ce00523g), 2017-01-01
Supplement: c7ce00523g1.pdf [file c7ce00523g1.pdf]

## Electronic Supplementary Information

**Design of nanostructured  $\text{WO}_3 \cdot 0.33\text{H}_2\text{O}$  via combination of ultrasonic spray nozzle and microwave-assisted hydrothermal for enhancing isopropanol gas sensing at room temperature**

*T. M. Perfecto, C. A. Zito and D. P. Volanti\**

LabMatSus – Laboratory of Materials for Sustainability, IBILCE, UNESP – Univ Estadual Paulista, Rua Cristóvão Colombo, 2265, S. J. Rio Preto 15054-000, Brazil.

\*E-mail: volanti@ibilce.unesp.br

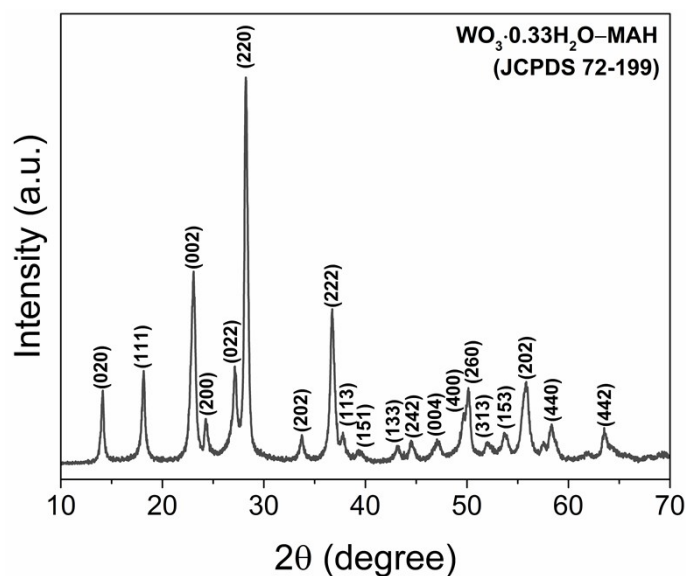

**Fig. S1** XRD pattern of  $\text{WO}_3 \cdot 0.33\text{H}_2\text{O}$ -MAH.

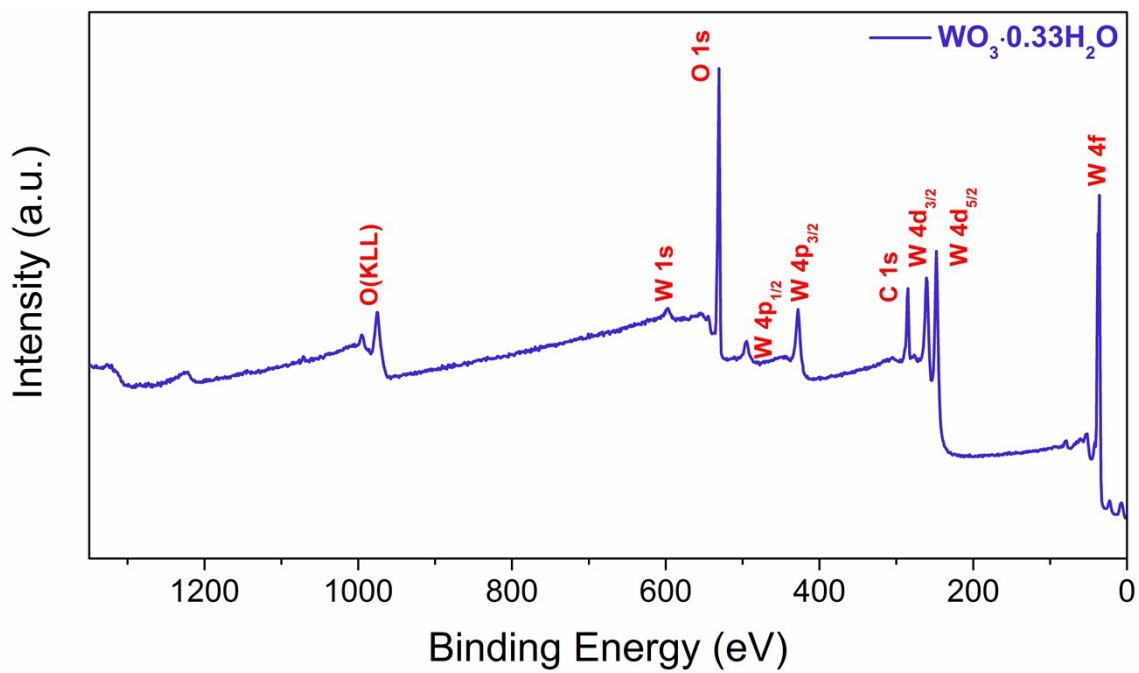

**Fig. S2** Survey-scan XPS spectrum of  $\text{WO}_3 \cdot 0.33\text{H}_2\text{O}$ -USN-MAH.

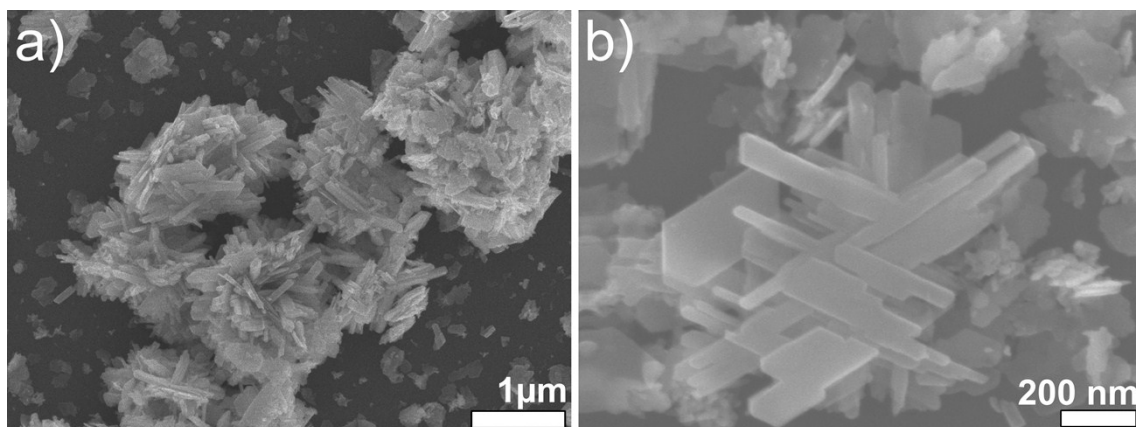

**Fig. S3** FESEM images of  $\text{WO}_3 \cdot 0.33\text{H}_2\text{O}$ -USN-MAH sample. (a) Low magnification image, and (b) 2D branches plates structures.

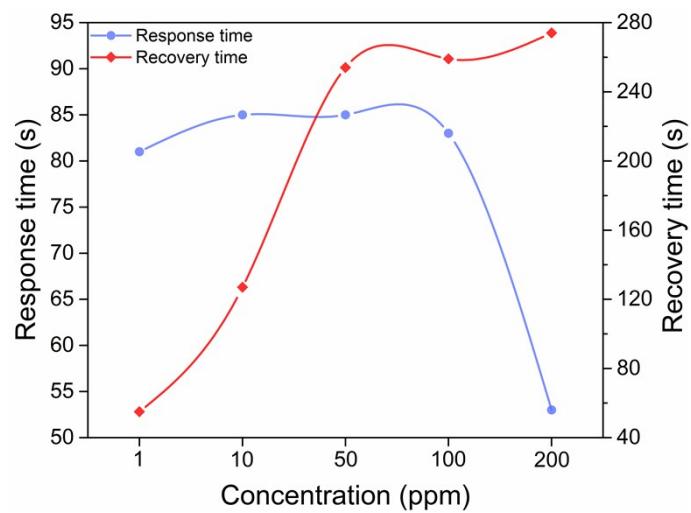

**Fig. S4** Response and recovery time of  $\text{WO}_3 \cdot 0.33\text{H}_2\text{O}$ -USN-MAH sample in the range of isopropanol concentration of 1–200 ppm.
